# Supplementary material for: Degenerative Encephalopathy in Nova Scotia Duck Tolling Retrievers Presenting with a Rapid Eye Movement Sleep Behavior Disorder
Source: PubMed Central journal article supplement — J Vet Intern Med. 2016 Sep 22;30(5):1681–9. doi: 10.1111/jvim.14575 (PMC5032881; doi:10.1111/jvim.14575), 2016-09-22
Supplement: JVIM-30-1681-s001.pdf [file JVIM-30-1681-s001.pdf]

**Supplementary Table S1**

| Reagent                                | Pretreat          | Dilution | Source          | Target                                                                |
|----------------------------------------|-------------------|----------|-----------------|-----------------------------------------------------------------------|
| Calbindin, murine                      | DIVA <sup>a</sup> | 1:200    | Vector VP-C301  | Purkinje cells and other specific neuronal populations <sup>1,2</sup> |
| Calretinin, rabbit                     | BORG <sup>b</sup> | 1:30     | Vector, VP-T489 | Granular cells, mossy and climbing fibers <sup>2</sup>                |
| GFAP, rabbit                           | None              | 1:2000   | Dako 2033-1     | Intermediate filament of astrocytes                                   |
| Neurofilament H, murine                | BORG <sup>2</sup> | 1:500    | SMI-32          | Stains larger neurons in the cerebrum and some axons                  |
| Neurofilament (phosphorylated), murine | None              | 1:600    | SMI-34          | Specific for axons <sup>3</sup>                                       |
| NeuN, murine                           | DIVA <sup>a</sup> | 1:90     | Chemicon MAB337 | DNA binding protein specific for many neurons                         |
| Parvalbumin, murine                    | DIVA <sup>a</sup> | 1:200    | 2Q135           | Basket cells <sup>1,2</sup>                                           |

<sup>a</sup> Diva Decloaker; Biocare, Concord CA, USA

<sup>b</sup> Borg Decloaker; Biocare, Concord CA, USA

1. Siso S, Tort S, Aparici C, et al. Abnormal neuronal expression of the calcium-binding proteins, parvalbumin and calbindin D-28k, in aged dogs. *J Comp Pathol* 2003;128:9-14.
2. Bastianelli E. Distribution of calcium-binding proteins in the cerebellum. *Cerebellum* 2003;2:242-262.
3. Shea TB, Beermann ML. Evidence that the monoclonal antibodies SMI-31 and SMI-34 recognize different phosphorylation-dependent epitopes of the murine high molecular mass neurofilament subunit. *J Neuroimmunol* 1993;44:117-121.
