# Supplementary material for: Degenerative Encephalopathy in Nova Scotia Duck Tolling Retrievers Presenting with a Rapid Eye Movement Sleep Behavior Disorder
Source: PubMed Central journal article supplement — J Vet Intern Med. 2016 Sep 22;30(5):1681–9. doi: 10.1111/jvim.14575 (PMC5032881; doi:10.1111/jvim.14575), 2016-09-22
Supplement: JVIM-30-1681-s002.pdf [file JVIM-30-1681-s002.pdf]

| Dog | Sex | Age at onset (months) | Owner reported clinical signs                                                                                                                                                                                                                                                            | Sleep disturbances          | Other history                                         | General physical examination                                                                                                   | Neurological examination abnormalities                                                                                                                                                                                                                                                                            | Clinical pathology performed                                                                                                                                                                                                                                     | Advanced imaging                                  | Response to medication                                                                                                                                                                                                                               | Alive / Dead (post-mortem examination) |
|-----|-----|-----------------------|------------------------------------------------------------------------------------------------------------------------------------------------------------------------------------------------------------------------------------------------------------------------------------------|-----------------------------|-------------------------------------------------------|--------------------------------------------------------------------------------------------------------------------------------|-------------------------------------------------------------------------------------------------------------------------------------------------------------------------------------------------------------------------------------------------------------------------------------------------------------------|------------------------------------------------------------------------------------------------------------------------------------------------------------------------------------------------------------------------------------------------------------------|---------------------------------------------------|------------------------------------------------------------------------------------------------------------------------------------------------------------------------------------------------------------------------------------------------------|----------------------------------------|
| 1   | F   | 12                    | Excessive response to loud noises; heightened anxiety; inappropriate barking; ball-guarding                                                                                                                                                                                              | From 12 months; progressive | Previous reactive lymphadenopathy of unknown etiology | Small in stature (comparison to a littermate-sibling of same sex, neuter status and similar body condition; 15.7kg vs. 21.2kg) | At 32 months (progressive at later visits) fine head tremor, crossed extensors in all limbs, brisk tendon reflexes in all limbs. At 37 months (progressive at later visits) stiff stilted gait with hypermetria in all limbs. At 47 months developed keratoconjunctivitis sicca with bilateral corneal ulceration | Hematology, serum biochemistry, CSF analysis, infectious disease screening ( <i>Toxoplasma gondii</i> ; <i>Neospora caninum</i> ; <i>canine distemper virus</i> ), bile acid stimulation test, ACTH stimulation test, serum cobalamin, urine organic metabolites | MRI (n=3); progressive caudate nucleus cavitation | Imepitoin (12-30mg/kg orally twice daily) – equivocal response reported by owners<br>Levetiracetam (15mg/kg orally three times daily) - equivocal response reported by owners<br>Acetaminophen (12mg/kg orally twice daily) – no perceived response. | Euthanized at 48 months (Yes)          |
| 2   | MN  | 7                     | Excessive response to loud noises; separation anxiety; minimal tail movement; reluctant to exercise at 33 months; ataxia at 60 months; fecal and urinary incontinence; food obsession                                                                                                    | Lifelong; progressive       | Lipoma                                                | Grade 2/6 left systolic heart murmur and relative bradycardia (ECG, echocardiography unremarkable)                             | At 62 months manic mentation; ataxic in all limbs (hind > fore); hypermetria of the forelimbs; decreased hopping in all limbs; proprioceptive deficits in the hindlimbs; crossed extensor of the hind limbs; bilateral mild reduction in menace                                                                   | Hematology, serum biochemistry, CSF analysis, infectious disease screening ( <i>Toxoplasma gondii</i> ; <i>Neospora caninum</i> ; <i>canine distemper virus</i> ), plasma ammonia, serum thiamine, urine organic metabolites                                     | MRI (n=1); marked caudate nucleus cavitation      | Prednisolone (maximum 0.54mg/kg twice daily orally then tapered to 0.54mg/kg every other day) – variable, partial improvement in ataxia                                                                                                              | Alive at 95 months (n/a)               |
| 3   | M   | 12                    | Altered interaction with stimulae (people / noises); swam vertically in water                                                                                                                                                                                                            | From 32 months; progressive | SRMA at 10 months (relapse at 32 months)              | Unremarkable                                                                                                                   | At 32 months depressed mentation; dysmetria in all limbs (fore > hind); mild bilateral lateral strabismus                                                                                                                                                                                                         | Hematology, serum biochemistry, serum thiamine, CSF analysis                                                                                                                                                                                                     | MRI (n=1); marked caudate nucleus cavitation      | Prednisolone (2mg/kg/day then tapered) – behavior worse on treatment                                                                                                                                                                                 | Alive at 49 months (n/a)               |
| 4   | M   | 24                    | Generalized ataxia, gait abnormalities; aggression                                                                                                                                                                                                                                       | Not reported                | None                                                  | Unremarkable                                                                                                                   | At 36 months ataxia and hypermetria in all limbs (hind > fore); mild muscle atrophy; mild proprioceptive deficits in all limbs                                                                                                                                                                                    | Not performed                                                                                                                                                                                                                                                    | Not performed                                     | None                                                                                                                                                                                                                                                 | Euthanized at 37 months (No)           |
| 5   | M   | 12                    | Inappropriate (excessive) response to stimulation; fecal and urinary incontinence at exercise; dog-dog aggression; swam vertically in water; unable to wag tail; difficulty on stairs / jumping                                                                                          | From 12 months              | None                                                  | Unremarkable                                                                                                                   | Circling to right; left sided proprioceptive deficits; ataxia and hypermetria in all limbs (hind > fore); slightly reduced menace response on left                                                                                                                                                                | Hematology, serum biochemistry, plasma amino acid levels, urine organic metabolites                                                                                                                                                                              | Not performed                                     | None                                                                                                                                                                                                                                                 | Alive at 36 months (n/a)               |
| 6   | F   | <24                   | Loss of initial training and house breaking, separation anxiety; food obsession; loss of tail movements; episodes of “blinking out”                                                                                                                                                      | Yes                         | Episode of aspiration pneumonia; hind limb lameness.  | Unremarkable                                                                                                                   | No record of complete neurologic exam                                                                                                                                                                                                                                                                             | Not performed                                                                                                                                                                                                                                                    | Not performed                                     | Meloxicam (0.1 mg/kg once daily orally) for lameness                                                                                                                                                                                                 | Alive at 36 months (n/a)               |
| 7   | M   | 6                     | Inappropriate (excessive) response to stimulation from two months; ataxia from six months; swam vertically in water from 6 months; poor concentration in training from 6 months; aggression (dog-dog from 6 months; dog-human from 24 months); reduced tail movements; circling behavior | Yes                         | Distichiasis (surgically corrected at 36 months)      | Unremarkable                                                                                                                   | Ataxia and hypermetria in all limbs (hind > fore)                                                                                                                                                                                                                                                                 | Not performed                                                                                                                                                                                                                                                    | Not performed                                     | None                                                                                                                                                                                                                                                 | Euthanized at 39 months (No)           |

|   |   |    |                                                                                                                                                                                                                                                                                                                             |                               |      |              |                                                                                                                                                                                                                   |                                                               |                                            |                                                         |                               |
|---|---|----|-----------------------------------------------------------------------------------------------------------------------------------------------------------------------------------------------------------------------------------------------------------------------------------------------------------------------------|-------------------------------|------|--------------|-------------------------------------------------------------------------------------------------------------------------------------------------------------------------------------------------------------------|---------------------------------------------------------------|--------------------------------------------|---------------------------------------------------------|-------------------------------|
| 8 | F | 3  | Inappropriate (excessive) response to stimulation (manic, spins, running back and forth) from three months; poor training, ataxia, and loss of tail movements from 18 months; swam vertically in water; food / water obsession                                                                                              | From four months; progressive | None | Unremarkable | At 58 months, continuously alert (failed to relax); pacing gait; possible mild head tilt to left; ataxia and hypermetria in all limbs (hind > fore); reduced tail movement; mildly reduced hopping (hind > fore); | Hematology, serum biochemistry, serum thyroxine, CSF analysis | MRI (n=1); mild caudate nucleus cavitation | Carprofen (2 mg/kg twice daily orally) – no improvement | Euthanized at 58 months (Yes) |
| 9 | M | 18 | Inappropriate (excessive) response to stimulation from three months; swam vertically in water from four months; poor concentration in training from six months; separation anxiety from three months; aggression, (dog-dog from 12 months; dog-human from 42 months); ataxia from 12 months; fecal and urinary incontinence | From 18 months                | None | Unremarkable | Ataxia and hypermetria in all limbs (hind > fore)                                                                                                                                                                 | Hematology, serum biochemistry                                | Not performed                              | None                                                    | Euthanized at 42 months (Yes) |

**Supplementary Table S2**
